# Supplementary material for: What helps and hinders the provision of healthcare that minimises treatment burden and maximises patient capacity? A qualitative study of stroke health professional perspectives
Source: PubMed Central journal article supplement — BMJ Open. 2020 Mar 18;10(3):e034113. doi: 10.1136/bmjopen-2019-034113 (PMC7150601; doi:10.1136/bmjopen-2019-034113), 2020-03-18
Supplement: bmjopen-2019-034113supp003.pdf [file bmjopen-2019-034113supp003.pdf]

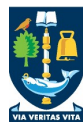

University of Glasgow | College of Medical,  
Veterinary & Life Sciences

Centre Number:  
Project Number: 301100  
Subject Identification Number for this trial:

## CONSENT FORM

### Title of Project:

Optimising healthcare for stroke survivors - a study of health professional perspectives on minimising treatment burden and maximising patient capacity

### Name of Researcher(s):

Dr Katie Gallacher  
Prof Frances Mair

Please initial box

I confirm that I have read and understand the information sheet dated \_\_\_\_\_  
(version \_\_\_\_ ) for the above study and have had the opportunity to ask questions.

I understand that my participation is voluntary and that I am free to withdraw at  
any time, without giving any reason, without my legal rights being affected.

I agree to take part in the above study.

\_\_\_\_\_  
Name of subject                                              Date                                              Signature

\_\_\_\_\_  
Name of Person taking consent  
(if different from researcher)                      Date                                              Signature

\_\_\_\_\_  
Researcher                                                      Date                                              Signature

(1 copy for subject; 1 copy for researcher)

College of MVLS  
Ethics Committee

Version 2 13/9/17
