# Supplementary material for: What helps and hinders the provision of healthcare that minimises treatment burden and maximises patient capacity? A qualitative study of stroke health professional perspectives
Source: PubMed Central journal article supplement — BMJ Open. 2020 Mar 18;10(3):e034113. doi: 10.1136/bmjopen-2019-034113 (PMC7150601; doi:10.1136/bmjopen-2019-034113), 2020-03-18
Supplement: bmjopen-2019-034113supp004.pdf [file bmjopen-2019-034113supp004.pdf]

*Initial broad thematic categories (nodes) that formed the code manual*

1. Information provision to stroke survivors
2. Communication between Health & Social services
3. Support for psychological difficulties
4. Support for physical disabilities
5. Support for cognitive difficulties
6. Communication between Hospital & Community teams
7. Communication between Primary & Secondary care
8. Nursing Care
9. Dealing with co-morbidities
10. Social services support in the community
11. Medication Adherence
12. Medication Review
13. Financial Support
14. Discharge Process
15. Community Stroke Team Support (CST)
16. Hospital stay
17. Rehabilitation in the Hospital
18. Rehabilitation in the Community
